# Supplementary material for: DNA Oxidative Cleavage Induced by the Novel Peptide Derivatives of 3‐(quinoxalin‐6‐yl)alanine in Combination with Cu(II) or Fe(II) Ions
Source: Hindawi journal article supplement (doi:10.1155/2009/906836), 2009-01-01
Supplement: f1 [file 906836.f1.pdf]

## Supplementary material

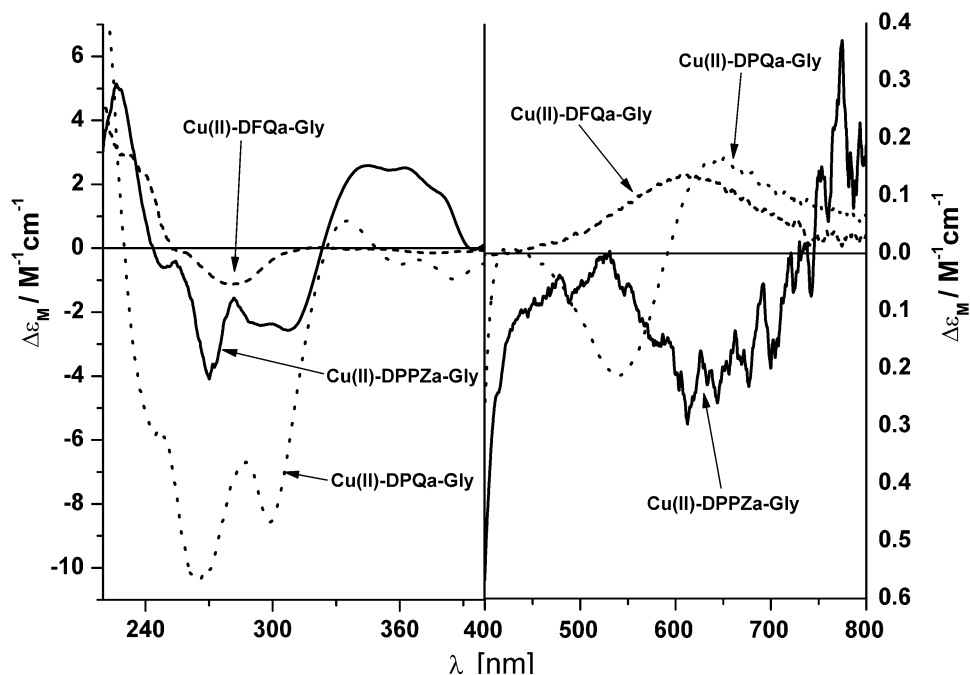

**Supplementary Figure 1.** Circular dichroism spectra of the Cu(II) complexes with DPPZa-Gly, DPQa-Gly and DFQa-Gly, concentration of metal 1 mM, metal-to-ligand molar ratio 1:2.

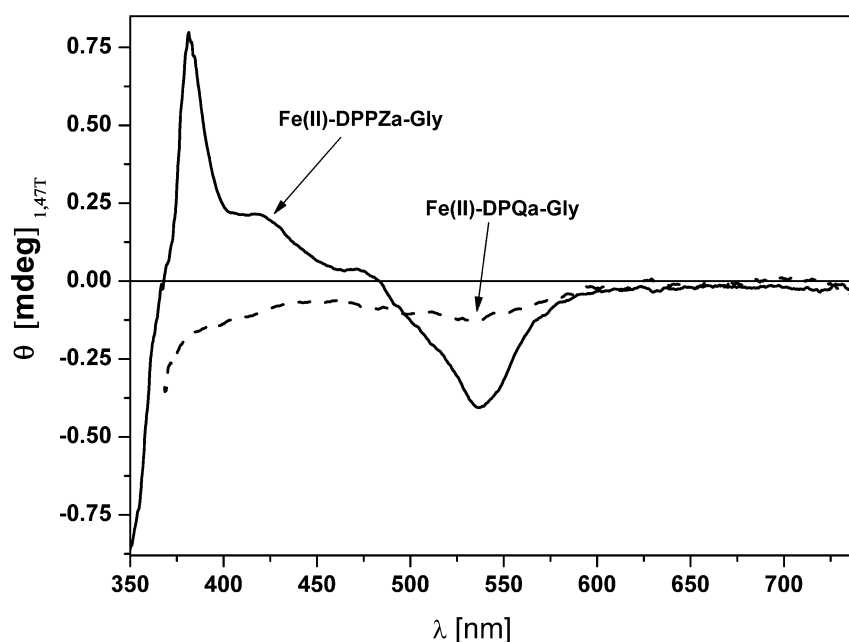

**Supplementary Figure 2.** Magnetic circular dichroism spectra of the Fe(II)-DPPZa-Gly and Fe(II)-DPQa-Gly complexes; concentration of metal 1 mM, metal-to-ligand molar ratio 1:3.

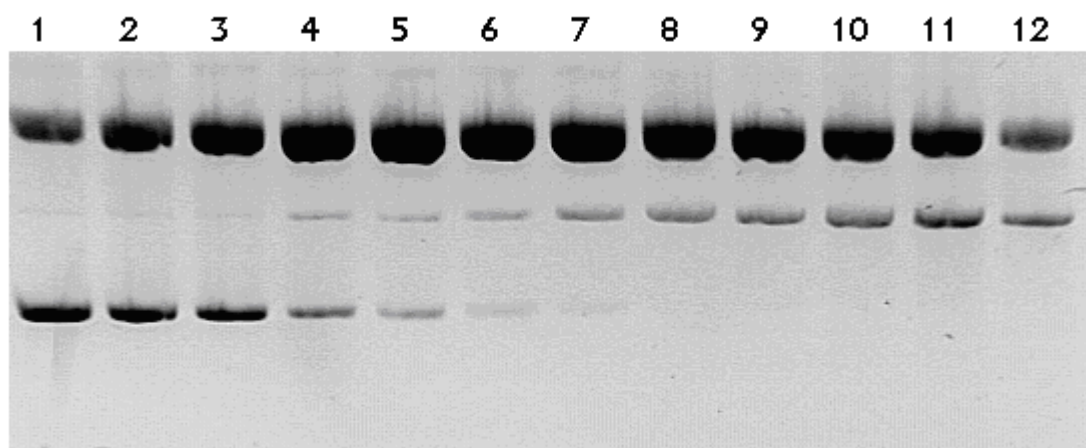

**Supplementary Figure 3.** Kinetics of the DNA cleavage in the presence of the Cu(II)-DFQa-Gly complex, accompanied by H<sub>2</sub>O<sub>2</sub>. Incubation periods: 0, 3, 5, 10, 20, 30, 45, 60, 75, 105, 135, and 180 min (lanes 1-12, respectively).

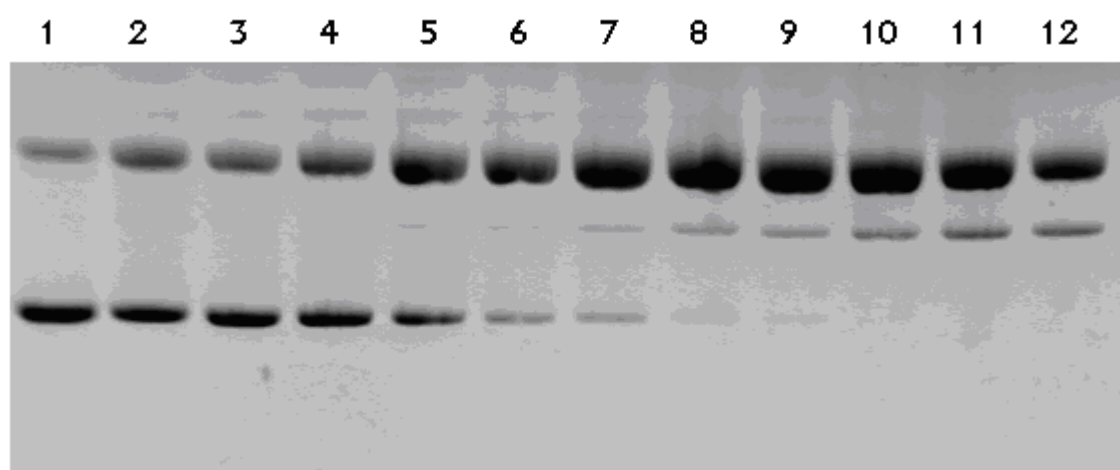

**Supplementary Figure 4.** Kinetics of the DNA cleavage in the presence of the Cu(II)-DPQa-Gly complex, accompanied by H<sub>2</sub>O<sub>2</sub>. Incubation periods: 0, 3, 5, 10, 20, 30, 45, 60, 75, 105, 135, and 180 min (lanes 1-12, respectively).

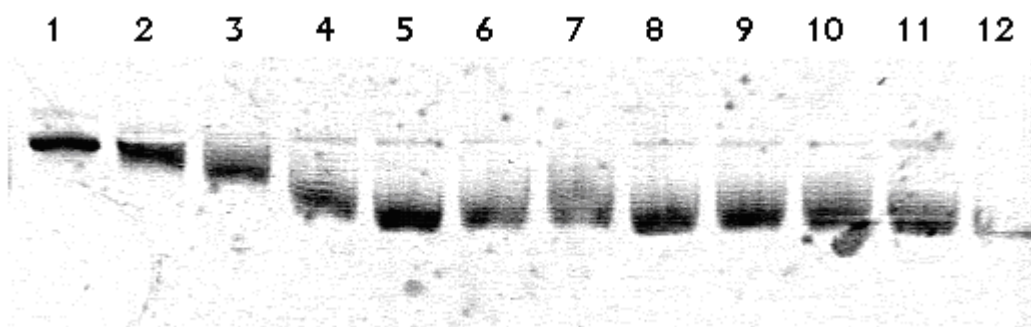

**Supplementary Figure 5.** Relative mobility of the plasmid DNA in the presence of DPPZa-Gly (lanes 1-6) and DPQa-Gly (lanes 7-12) at concentrations 5 mM, 1 mM, 500  $\mu$ M, 100  $\mu$ M, 50  $\mu$ M, and 5  $\mu$ M, respectively, for each compound.
